# Supplementary material
Source: publisher site journal article supplement (https://www.spandidos-publications.com/7292/downloadSupplementary)
Supplement: Supplementary file 1 [file downloadSupplementary]

Table SI. Markers in patients categorized by the CDC-XM levels.

| A, Scr          |          |                          |                         |           |         |
|-----------------|----------|--------------------------|-------------------------|-----------|---------|
| Group           |          | CDC>10% (n=16)           | CDC≤10% (n=96)          | t/Z-value | P-value |
| Pre-transplant  | 1 day    | 1005.16±265.08           | 904.82±274.86           | 1.358     | 0.177   |
| Post-transplant | 1 day    | 1039.60 (878.08-1203.13) | 722.05 (490.20 -955.70) | -2.644    | 0.008   |
| Post-transplant | 2 days   | 832.75 (535.28-1015.93)  | 420.65 (216.70-751.95)  | -2.752    | 0.006   |
| Post-transplant | 3 days   | 524.25 (313.75-910.35)   | 232.25 (150.55-546.80)  | -2.956    | 0.003   |
| Post-transplant | 7 days   | 243.55 (142.90-355.08)   | 155.70 (105.68-274.23)  | -2.075    | 0.038   |
| Post-transplant | 1 month  | 179.51 (135.25-362.85)   | 159.90 (116.35-225.30)  | -1.256    | 0.209   |
| Post-transplant | 3 months | 162.50 (122.25-184.25)   | 138.50 (107.75-163.75)  | -1.701    | 0.089   |
| Post-transplant | 6 months | 144.43 (144.43-164.75)   | 144.43 (116.75-158.50)  | -1.105    | 0.269   |
| B, Urea         |          |                          |                         |           |         |
| Group           |          | CDC>10%<br>n=16          | CDC≤10%<br>n=96         | t/Z       | P-value |
| Pre-transplant  | 1 day    | 21.88±6.73               | 20.73±7.38              | 0.045     | 0.965   |
| Post-transplant | 1 day    | 26.03±6.30               | 23.43±7.17              | 1.364     | 0.175   |
| Post-transplant | 2 days   | 29.09±8.54               | 24.60±9.45              | 1.783     | 0.077   |
| Post-transplant | 3 days   | 28.28 (22.15-38.91)      | 20.21 (14.52-33.28)     | -2.058    | 0.040   |
| Post-transplant | 7 days   | 23.20 (15.69-46.09)      | 16.94 (12.46-29.11)     | -1.971    | 0.049   |
| Post-transplant | 1 month  | 13.82 (9.96-25.04)       | 10.66 (7.95-16.23)      | -1.322    | 0.186   |
| Post-transplant | 3 months | 8.53 (7.41-15.29)        | 9.26 (7.29-11.97)       | -0.561    | 0.575   |
| Post-transplant | 6 months | 9.49 (8.05-9.49)         | 9.49 (6.91-10.80)       | -0.515    | 0.607   |
| C, eGFR         |          |                          |                         |           |         |
| Group           |          | CDC>10%<br>n=16          | CDC≤10%<br>n=96         | t/Z       | P-value |
| Pre-transplant  | 1 day    | 5.00 (4.00-7.00)         | 6.00 (4.00-7.75)        | -0.934    | 0.350   |
| Post-transplant | 1 day    | 5.00 (4.00-6.75)         | 8.00 (5.00-12.00)       | -2.073    | 0.038   |
| Post-transplant | 2 days   | 6.00 (5.25-12.25)        | 14.00 (7.00-34.00)      | -2.368    | 0.018   |
| Post-transplant | 3 days   | 11.50 (6.00-23.00)       | 29.00 (10.00-51.75)     | -2.587    | 0.010   |
| Post-transplant | 7 days   | 31.50 (17.25-58.00)      | 47.50 (23.50-76.00)     | -1.676    | 0.094   |

|                        |   |                     |                     |        |       |
|------------------------|---|---------------------|---------------------|--------|-------|
| Post-transplant month  | 1 | 40.52±20.97         | 49.71±27.03         | -1.257 | 0.211 |
| Post-transplant months | 3 | 52.41±18.85         | 59.34±22.75         | -1.294 | 0.198 |
| Post-transplant months | 6 | 58.80 (48.25-58.80) | 58.80 (47.25-67.50) | -0.280 | 0.779 |

#### D, GLU

| Group                  |   | CDC>10%<br>n=16  | CDC≤10%<br>n=96  | t/Z    | P-value |
|------------------------|---|------------------|------------------|--------|---------|
| Pre-transplant 1 day   |   | 5.51 (4.78-7.23) | 5.51 (4.80-6.23) | -0.096 | 0.924   |
| Post-transplant day    | 1 | 8.10 (6.01-9.54) | 6.98 (6.19-8.06) | -1.281 | 0.200   |
| Post-transplant days   | 2 | 7.69 (6.50-8.42) | 7.28 (6.47-8.02) | -1.102 | 0.271   |
| Post-transplant days   | 3 | 7.38 (6.77-8.54) | 7.41 (6.70-8.18) | -0.112 | 0.911   |
| Post-transplant days   | 7 | 5.20 (4.92-6.11) | 5.40 (4.89-6.10) | -0.021 | 0.983   |
| Post-transplant month  | 1 | 5.41 (4.85-6.21) | 5.48 (4.95-6.30) | -0.183 | 0.855   |
| Post-transplant months | 3 | 5.45 (5.20-8.06) | 5.34 (4.88-6.05) | -1.513 | 0.130   |
| Post-transplant months | 6 | 5.78 (5.11-5.78) | 5.52 (4.94-5.78) | -0.820 | 0.412   |

#### E, RET%

| Group                  |   | CDC>10%<br>n=16  | CDC≤10%<br>n=96  | Z      | P-value |
|------------------------|---|------------------|------------------|--------|---------|
| Pre-transplant 1 day   |   | 1.86 (1.57-2.16) | 1.67 (0.92-2.36) | -0.744 | 0.457   |
| Post-transplant day    | 1 | 1.92 (1.29-2.19) | 1.82 (1.11-2.56) | -0.150 | 0.881   |
| Post-transplant days   | 2 | 1.93 (1.32-2.12) | 7.28 (6.47-8.02) | -0.137 | 0.891   |
| Post-transplant days   | 3 | 1.63 (1.33-1.97) | 1.66 (1.00-2.63) | -0.050 | 0.960   |
| Post-transplant days   | 7 | 1.63 (1.33-1.97) | 1.66 (1.00-2.63) | -0.050 | 0.960   |
| Post-transplant month  | 1 | 2.43 (1.57-3.87) | 2.51 (1.75-3.44) | -0.229 | 0.819   |
| Post-transplant months | 3 | 2.54 (2.19-3.38) | 2.25 (1.79-2.94) | -1.38  | 0.167   |
| Post-transplant months | 6 | 2.38 (2.27-2.63) | 2.27 (1.82-2.40) | -2.552 | 0.011   |

#### F, RET#

| Group                |   | CDC>10%<br>n=16 | CDC≤10%<br>n=96 | t/Z    | P-value |
|----------------------|---|-----------------|-----------------|--------|---------|
| Pre-transplant 1 day |   | 0.07±0.02       | 0.57±0.03       | 0.836  | 0.405   |
| Post-transplant day  | 1 | 0.06±0.02       | 0.06±0.03       | 0.211  | 0.835   |
| Post-transplant      | 2 | 0.06±0.02       | 0.06±0.03       | -0.136 | 0.893   |

|                        |   |                   |                  |        |       |
|------------------------|---|-------------------|------------------|--------|-------|
| days                   |   |                   |                  |        |       |
| Post-transplant days   | 3 | 0.06±0.02         | 0.57±0.03        | -0.225 | 0.823 |
| Post-transplant days   | 7 | 0.06 (0.40-0.08)  | 0.05 (0.03-0.08) | -0.474 | 0.636 |
| Post-transplant month  | 1 | 0.09 (0.04--0.13) | 0.09 (0.06-0.11) | -0.175 | 0.861 |
| Post-transplant months | 3 | 0.11 (0.07-0.22)  | 0.09 (0.07-0.11) | -0.146 | 0.884 |
| Post-transplant months | 6 | 0.10 (0.10-0.11)  | 0.10 (0.08-0.11) | -1.590 | 0.112 |

G, LFR

| Group                  |   | CDC>10%<br>n=16     | CDC≤10%<br>n=96     | t/Z    | P-value |
|------------------------|---|---------------------|---------------------|--------|---------|
| Pre-transplant 1 day   |   | 84.65 (76.6-93.58)  | 89.95 (83.88-94.38) | -1.613 | 0.107   |
| Post-transplant day    | 1 | 85.10 (80.88-90.80) | 88.95 (79.60-92.50) | -0.994 | 0.320   |
| Post-transplant days   | 2 | 87.95 (79.53-93.28) | 89.30 (84.12-93.45) | -0.624 | 0.533   |
| Post-transplant days   | 3 | 87.45 (79.30-93.15) | 89.20 (84.40-93.30) | -0.711 | 0.477   |
| Post-transplant days   | 7 | 84.30 (78.00-91.98) | 86.15 (80.45-91.90) | -0.902 | 0.367   |
| Post-transplant month  | 1 | 83.80 (74.80-87.82) | 87.00 (82.63-91.28) | -1.497 | 0.134   |
| Post-transplant months | 3 | 81.10 (77.72-85.65) | 84.40 (79.40-88.98) | -1.742 | 0.081   |
| Post-transplant months | 6 | 82.01 (76.43-82.01) | 82.55 (80.55-86.83) | -2.113 | 0.035   |

H, MFR

| Group                  |   | CDC>10%<br>n=16     | CDC≤10%<br>n=96     | t/Z    | P-value |
|------------------------|---|---------------------|---------------------|--------|---------|
| Pre-transplant 1 day   |   | 12.30±5.15          | 8.45±4.73           | 1.584  | 0.116   |
| Post-transplant day    | 1 | 10.78±4.13          | 10.18±4.57          | 0.562  | 0.575   |
| Post-transplant days   | 2 | 10.28±5.13          | 9.08±4.21           | 1.010  | 0.315   |
| Post-transplant days   | 3 | 9.45±3.79           | 9.52±4.53           | 0.062  | 0.951   |
| Post-transplant days   | 7 | 12.56±4.68          | 11.39±5.99          | 0.698  | 0.487   |
| Post-transplant month  | 1 | 11.91±5.40          | 10.88±5.25          | 0.721  | 0.473   |
| Post-transplant months | 3 | 14.05 (11.25-15.93) | 13.2 (9.90-14.40)   | -1.472 | 0.141   |
| Post-transplant months | 6 | 13.04 (13.04-16.18) | 13.04 (10.90-14.40) | -1.343 | 0.179   |

I, HFR

| Group |  | CDC>10% | CDC≤10% | Z | P-value |
|-------|--|---------|---------|---|---------|
|-------|--|---------|---------|---|---------|

|                        | n=16               | n=96             |        |       |
|------------------------|--------------------|------------------|--------|-------|
| Pre-transplant 1 day   | 2.55 (0.98-3.90)   | 1.40 (0.43-3.08) | -1.711 | 0.086 |
| Post-transplant day    | 1 2.30 (0.78-3.95) | 1.65 (0.70-6.88) | -0.052 | 0.600 |
| Post-transplant days   | 2 1.50 (0.40-4.00) | 1.50 (0.73-3.15) | -0.079 | 0.937 |
| Post-transplant days   | 3 1.75 (0.50-3.85) | 1.30 (0.63-3.05) | -0.458 | 0.647 |
| Post-transplant days   | 7 1.90 (0.63-3.30) | 1.80 (0.83-3.92) | -0.133 | 0.894 |
| Post-transplant month  | 1 2.79 (1.30-7.68) | 1.85 (0.93-3.10) | -1.185 | 0.236 |
| Post-transplant months | 3 4.49 (2.31-7.53) | 2.85 (1.60-6.34) | -1.106 | 0.269 |
| Post-transplant months | 6 4.10 (3.65-6.18) | 3.00 (1.90-4.10) | -1.737 | 0.082 |

#### J, RET-He

| Group                  | CDC>10%<br>n=16       | CDC≤10%<br>n=96     | Z      | P-value |
|------------------------|-----------------------|---------------------|--------|---------|
| Pre-transplant 1 day   | 32.2 (30.38-33.93)    | 32.3 (29.6-33.25)   | -0.682 | 0.511   |
| Post-transplant day    | 1 32.05 (31.23-34.4)  | 31.85 (30.33-33.18) | -1.160 | 0.246   |
| Post-transplant days   | 2 31.55 (31.18-32.55) | 31.10 (29.12-32.38) | -1.593 | 0.111   |
| Post-transplant days   | 3 30.85 (29.45-31.60) | 30.75 (29.03-32.38) | -0.299 | 0.765   |
| Post-transplant days   | 7 34.20 (32.65-35.28) | 33.50 (31.30-34.41) | -1.634 | 0.102   |
| Post-transplant month  | 1 31.15 (29.51-33.75) | 30.50 (27.93-32.58) | -0.911 | 0.363   |
| Post-transplant months | 3 31.45 (29.78-32.08) | 31.20 (28.40-32.70) | -0.087 | 0.930   |
| Post-transplant months | 6 29.85 (29.85-31.80) | 29.85 (29.18-32.10) | -0.159 | 0.874   |

#### K, WBC

| Group                  | CDC>10%<br>n=16       | CDC≤10%<br>n=96    | t/Z    | P-value |
|------------------------|-----------------------|--------------------|--------|---------|
| Pre-transplant 1 day   | 6.58 (5.36-6.96)      | 6.06 (5.11-8.18)   | -0.091 | 0.947   |
| Post-transplant day    | 1 11.95±4.04          | 12.54±4.42         | -0.508 | 0.612   |
| Post-transplant days   | 2 10.89 (10.28-15.41) | 12.15 (8.62-15.68) | -0.403 | 0.687   |
| Post-transplant days   | 3 10.53±4.06          | 10.02±4.14         | 0.450  | 0.653   |
| Post-transplant days   | 7 8.95±2.83           | 10.04±3.96         | -1.055 | 0.294   |
| Post-transplant month  | 1 6.56 (4.69-9.02)    | 6.75 (5.14-8.84)   | -0.423 | 0.665   |
| Post-transplant months | 3 4.99 (3.56-6.06)    | 5.70 (4.09-7.42)   | -1.613 | 0.107   |

| months                 |   |                     |                     |        |         |
|------------------------|---|---------------------|---------------------|--------|---------|
| Post-transplant months | 6 | 6.96 (5.69-7.43)    | 6.96 (5.59-7.32)    | -0.339 | 0.735   |
| L, N%                  |   |                     |                     |        |         |
| Group                  |   | CDC>10%<br>n=16     | CDC≤10%<br>n=96     | t/Z    | P-value |
| Pre-transplant 1 day   |   | 70.00 (62.9-77.68)  | 65.75 (61.2-71.28)  | -1.455 | 0.148   |
| Post-transplant day    | 1 | 96.30 (94.80-96.95) | 96.4 (94.83-97.70)  | -0.790 | 0.429   |
| Post-transplant days   | 2 | 96.3 (93.73-97.35)  | 95.65 (94.10-97.30) | -0.329 | 0.743   |
| Post-transplant days   | 3 | 96.00 (95.35-97.38) | 95.05 (92.13-96.85) | -2.208 | 0.027   |
| Post-transplant days   | 7 | 81.56±6.30          | 80.30±6.50          | 0.738  | 0.462   |
| Post-transplant month  | 1 | 71.31±13.41         | 70.66±12.53         | 0.082  | 0.935   |
| Post-transplant months | 3 | 66.17±15.10         | 63.31±14.98         | 0.587  | 0.559   |
| Post-transplant months | 6 | 65.02 (65.02-69.83) | 65.02 (62.33-71.18) | -0.205 | 0.838   |
| M, N#                  |   |                     |                     |        |         |
| Group                  |   | CDC>10%<br>n=16     | CDC≤10%<br>n=96     | t/Z    | P-value |
| Pre-transplant 1 day   |   | 4.46 (3.26-5.21)    | 3.94 (3.18-5.28)    | -0.815 | 0.415   |
| Post-transplant day    | 1 | 11.44±3.96          | 12.07±4.31          | -0.548 | 0.585   |
| Post-transplant days   | 2 | 10.54 (9.62-14.42)  | 11.44 (8.04-14.80)  | -0.274 | 0.784   |
| Post-transplant days   | 3 | 9.40 (7.15-12.85)   | 8.64 (6.11-12.37)   | -0.665 | 0.506   |
| Post-transplant days   | 7 | 7.28±2.40           | 8.24±3.52           | -1.042 | 0.300   |
| Post-transplant month  | 1 | 4.48 (3.41-6.22)    | 4.56 (3.23-6.72)    | -0.050 | 0.960   |
| Post-transplant months | 3 | 2.96±1.47           | 3.90±2.15           | -1.675 | 0.097   |
| Post-transplant months | 6 | 4.73 (3.99-5.15)    | 4.73 (3.51-5.15)    | -0.481 | 0.630   |
| N, L%                  |   |                     |                     |        |         |
| Group                  |   | CDC>10%<br>n=16     | CDC≤10%<br>n=96     | t/Z    | P-value |
| Pre-transplant 1 day   |   | 17.25±7.78          | 8.45±4.73           | -2.191 | 0.031   |
| Post-transplant day    | 1 | 0.50 (0.50-1.18)    | 0.85 (0.60-1.30)    | -1.467 | 0.142   |
| Post-transplant days   | 2 | 0.60 (0.33-0.85)    | 0.90 (0.60-1.40)    | -2.720 | 0.007   |
| Post-transplant days   | 3 | 0.65 (0.53-0.93)    | 1.20 (0.80-1.88)    | -3.064 | 0.002   |

|                        |   |                     |                     |        |       |
|------------------------|---|---------------------|---------------------|--------|-------|
| Post-transplant days   | 7 | 5.20 (2.10-7.63)    | 7.00 (4.83-10.70)   | -2.058 | 0.040 |
| Post-transplant month  | 1 | 16.65±10.58         | 18.99±11.55         | -0.704 | 0.483 |
| Post-transplant months | 3 | 17.80 (11.03-27.31) | 22.49 (17.05-30.08) | -1.422 | 0.155 |
| Post-transplant months | 6 | 21.86 (18.28-22.34) | 21.86 (16.43-26.45) | -0.013 | 0.990 |

O, L#

| Group                  |   | CDC>10%<br>n=16  | CDC≤10%<br>n=96  | t/Z    | P-value |
|------------------------|---|------------------|------------------|--------|---------|
| Pre-transplant 1 day   |   | 1.15 (0.86-1.41) | 1.38 (0.98-1.58) | -1.725 | 0.086   |
| Post-transplant day    | 1 | 0.08 (0.04-0.13) | 0.11 (0.07-0.16) | -1.565 | 0.118   |
| Post-transplant days   | 2 | 0.07 (0.03-0.10) | 0.10 (0.07-0.16) | -2.325 | 0.020   |
| Post-transplant days   | 3 | 0.07 (0.04-0.10) | 0.11 (0.07-0.18) | -2.486 | 0.013   |
| Post-transplant days   | 7 | 0.41 (0.20-0.68) | 0.66 (0.43-1.07) | -2.437 | 0.015   |
| Post-transplant month  | 1 | 0.78 (0.49-1.27) | 1.13 (0.65-1.75) | -1.285 | 0.199   |
| Post-transplant months | 3 | 0.92 (0.55-1.51) | 1.19 (0.81-1.73) | -1.493 | 0.136   |
| Post-transplant months | 6 | 1.37 (1.00-1.69) | 1.37 (1.02-1.66) | -0.033 | 0.973   |

CDC-XM, complement-dependent cytotoxicity crossmatch; Scr, serum creatinine; eGFR, estimated glomerular filtration rate; GLU, blood glucose; Hb, hemoglobin; RET%, percentages of reticulocytes; RET#, absolute reticulocyte number; RET-He, reticulocyte haemoglobin content; LFR, low-fluorescence intensity reticulocytes; MFR, medium-fluorescence intensity reticulocytes; HFR, high-fluorescence intensity reticulocytes; WBC, white blood cell count; N%, the percentage of neutrophils; N#, the absolute number of neutrophils; L%, the percentage of lymphocytes; L#, the absolute number of lymphocytes.

Table SIII. Hb in patients categorized by the CDC-XM levels

| Hb                            | CDC>10%<br>Female n=0 | CDC < 10%<br>Female<br>n=28 | t/Z | P-<br>value | CDC>10%<br>Male n=16     | CDC≤10%<br>Male n=68   | t/Z    | P-<br>value |
|-------------------------------|-----------------------|-----------------------------|-----|-------------|--------------------------|------------------------|--------|-------------|
| Pre-transplant<br>1 day       | -                     | 97 (85.25-<br>112)          | -   | -           | 114.5 (95.75-<br>131.25) | 106 (92.25-126)        | -0.991 | -0.322      |
| Post-<br>transplant<br>day    | 1 -                   | 88.17±15.01                 | -   | -           | 103.63±18.39             | 102.77±19.19           | -0.160 | 0.874       |
| Post-<br>transplant<br>days   | 2 -                   | 88.60±25.35                 | -   | -           | 100.69±18.47             | 100.42±19.88           | -0.048 | 0.962       |
| Post-<br>transplant<br>days   | 3 -                   | 86.67±12.80                 | -   | -           | 99.06±17.14              | 101.17±20.30           | 0.385  | 0.701       |
| Post-<br>transplant<br>days   | 7 -                   | 83 (75-<br>92.75)           | -   | -           | 96 (83.25-111.50)        | 106 (91.25-<br>122.75) | -1.088 | 0.277       |
| Post-<br>transplant<br>month  | 1 -                   | 90.25±15.82                 | -   | -           | 94.65±14.99              | 105.02±22.27           | 1.766  | 0.081       |
| Post-<br>transplant<br>months | 3 -                   | 106.17±21.3<br>2            | -   | -           | 110.75±20.56             | 120.47±20.12           | 1.733  | 0.087       |
| Post-<br>transplant<br>months | 6 -                   | 126 (100-<br>127)           | -   | -           | 127 (115-127)            | 135 (123-144.75)       | -2.807 | 0.005       |

Hb, hemoglobin; CDC-XM, complement-dependent cytotoxicity crossmatch

Table SIII. Markers in patients categorized by HLA matching.

| A, Scr          |          |                        |                         |        |         |
|-----------------|----------|------------------------|-------------------------|--------|---------|
| Group           |          | HLA 0-2 MM<br>n=20     | HLA 3-6 MM<br>n=92      | t/Z    | P-value |
| Pre-transplant  | 1 day    | 826.61±279.70          | 939.28±270.82           | -1.677 | 0.096   |
| Post-transplant | 1 day    | 534.60 (282.98-605.70) | 865.35 (555.18-1090.50) | -3.548 | 0.000   |
| Post-transplant | 2 days   | 210.90 (141.58-284.23) | 525.65 (273.28-903.25)  | -4.524 | 0.000   |
| Post-transplant | 3 days   | 138.25 (106.35-176.25) | 317.70 (175.48-711.43)  | -4.596 | 0.000   |
| Post-transplant | 7 days   | 111.90 (83.83-156.85)  | 194.75 (126.60-348.70)  | -3.943 | 0.000   |
| Post-transplant | 1 month  | 139.50 (95.75-157.28)  | 144.00 (117.25-170.75)  | -2.040 | 0.041   |
| Post-transplant | 3 months | 133.50 (95.75-157.28)  | 144.00 (117.25-170.75)  | -1.197 | 0.231   |
| Post-transplant | 6 months | 137.00 (104.75-144.43) | 144.43 (123.25-161.50)  | -1.800 | 0.072   |
| B, Urea         |          |                        |                         |        |         |
| Group           |          | HLA 0-2 MM<br>n=20     | HLA 3-6 MM<br>n=92      | t/Z    | P-value |
| Pre-transplant  | 1 day    | 21.40±8.72             | 20.57±6.95              | 0.459  | 0.647   |
| Post-transplant | 1 day    | 21.02±6.29             | 24.41±7.13              | -1.964 | 0.052   |
| Post-transplant | 2 days   | 15.08 (12.55-22.74)    | 26.67 (19.80-33.70)     | -4.072 | 0.000   |
| Post-transplant | 3 days   | 12.98 (11.05-19.05)    | 24.20 (17.21-36.73)     | -4.148 | 0.000   |
| Post-transplant | 7 days   | 13.94 (10.80-15.80)    | 20.74 (13.30-35.58)     | -3.236 | 0.001   |
| Post-transplant | 1 month  | 9.98 (8.20-12.12)      | 11.16 (7.96-18.66)      | -0.767 | 0.443   |
| Post-transplant | 3 months | 9.19 (7.51-11.10)      | 9.21 (7.25-12.80)       | -0.406 | 0.684   |
| Post-transplant | 6 months | 9.49 (7.29-10.74)      | 9.49 (7.14-10.27)       | -0.585 | 0.559   |
| C, eGFR         |          |                        |                         |        |         |
| Group           |          | HLA 0-2 MM<br>n=20     | HLA 3-6 MM<br>n=92      | t/Z    | P-value |
| Pre-transplant  | 1 day    | 6.00 (5.00-9.00)       | 5.50 (4.00-7.00)        | -1.788 | 0.074   |
| Post-transplant | 1 day    | 11.50 (8.00-20.25)     | 6.00 (5.00-11.00)       | -3.479 | 0.001   |
| Post-transplant | 2 days   | 36.00 (24.25-46.75)    | 10.00 (5.25-24.75)      | -4.453 | 0.000   |
| Post-transplant | 3 days   | 56.00 (41.50-71.50)    | 18.00 (7.00-41.00)      | -4.454 | 0.000   |
| Post-transplant | 7 days   | 73.00 (46.50-92.50)    | 35.50 (17.00-66.00)     | -3.690 | 0.000   |

|                        |   |                     |                     |        |       |
|------------------------|---|---------------------|---------------------|--------|-------|
| Post-transplant month  | 1 | 57.30±23.48         | 46.46±26.96         | 1.665  | 0.099 |
| Post-transplant months | 3 | 60.5 (48.25-74.00)  | 52.50 (43.00-71.75) | -0.832 | 0.405 |
| Post-transplant months | 6 | 58.80 (48.50-70.50) | 58.80 (47.25-62.75) | -0.944 | 0.345 |

D, GLU

| Group                  |   | HLA 0-2 MM<br>n=20 | HLA 3-6 MM<br>n=92 | Z      | P-value |
|------------------------|---|--------------------|--------------------|--------|---------|
| Pre-transplant 1 day   |   | 5.03 (4.20-5.69)   | 5.68 (5.04-6.34)   | -3.115 | 0.002   |
| Post-transplant day    | 1 | 6.36 (5.62-7.06)   | 7.2 (6.42-8.85)    | -3.027 | 0.002   |
| Post-transplant days   | 2 | 6.99 (6.10-7.30)   | 7.49 (6.54-8.20)   | -2.310 | 0.021   |
| Post-transplant days   | 3 | 7.22 (6.26-8.05)   | 7.39 (6.75-8.24)   | -1.105 | 0.269   |
| Post-transplant days   | 7 | 4.97 (4.79-5.47)   | 5.44 (4.91-6.25)   | -2.344 | 0.019   |
| Post-transplant month  | 1 | 5.30 (4.76-5.66)   | 5.55 (4.99-6.52)   | -2.070 | 0.038   |
| Post-transplant months | 3 | 5.06 (4.77-5.51)   | 5.43 (4.91-6.63)   | -2.177 | 0.030   |
| Post-transplant months | 6 | 5.25 (4.88-5.78)   | 5.66 (5.04-5.78)   | -1.193 | 0.233   |

E, RET%

| Group                  |   | HLA 0-2 MM<br>n=20 | HLA 3-6 MM<br>n=92 | Z      | P-value |
|------------------------|---|--------------------|--------------------|--------|---------|
| Pre-transplant 1 day   |   | 1.53 (0.99-2.16)   | 1.73 (1.00-2.31)   | -0.627 | 0.531   |
| Post-transplant day    | 1 | 1.54 (1.00-2.61)   | 1.91 (1.23-2.38)   | -0.384 | 0.701   |
| Post-transplant days   | 2 | 1.70 (0.83-2.42)   | 1.89 (1.24-2.54)   | -0.729 | 0.466   |
| Post-transplant days   | 3 | 1.43 (0.95-2.49)   | 1.66 (1.13-2.42)   | -0.589 | 0.556   |
| Post-transplant days   | 7 | 1.86 (1.24-2.60)   | 1.53 (0.96-2.40)   | -1.216 | 0.224   |
| Post-transplant month  | 1 | 1.96 (1.66-2.68)   | 2.61 (1.86-3.56)   | -1.892 | 0.059   |
| Post-transplant months | 3 | 2.14 (1.56-3.07)   | 2.28 (1.91-2.95)   | -1.124 | 0.261   |
| Post-transplant months | 6 | 2.26 (1.59-2.53)   | 2.27 (1.94-2.51)   | -0.967 | 0.333   |

F, RET#

| Group                |   | HLA 0-2 MM<br>n=20 | HLA 3-6 MM<br>n=92 | t/Z    | P-value |
|----------------------|---|--------------------|--------------------|--------|---------|
| Pre-transplant 1 day |   | 0.05±0.02          | 0.06±0.03          | -1.280 | 0.203   |
| Post-transplant day  | 1 | 0.05±0.02          | 0.06±0.02          | -0.492 | 0.624   |
| Post-transplant      | 2 | 0.05±0.02          | 0.06±0.03          | -1.146 | 0.254   |

|                        |   |                  |                  |        |       |
|------------------------|---|------------------|------------------|--------|-------|
| days                   |   |                  |                  |        |       |
| Post-transplant days   | 3 | 0.05±0.02        | 0.05±0.02        | -0.372 | 0.710 |
| Post-transplant days   | 7 | 0.05 (0.04-0.08) | 0.05 (0.03-0.07) | -1.174 | 0.240 |
| Post-transplant month  | 1 | 0.06 (0.05-0.09) | 0.08 (0.05-0.11) | -1.413 | 0.158 |
| Post-transplant months | 3 | 0.09 (0.06-0.10) | 0.09 (0.07-0.11) | -0.399 | 0.690 |
| Post-transplant months | 6 | 0.10 (0.06-0.11) | 0.10 (0.08-0.11) | -0.772 | 0.440 |

G, LFR

| Group                  |   | HLA 0-2 MM<br>n=20  | HLA 3-6 MM<br>n=92  | Z      | P-value |
|------------------------|---|---------------------|---------------------|--------|---------|
| Pre-transplant 1 day   |   | 92.65 (84.00-96.60) | 89.40 (82.3-93.60)  | -1.645 | 0.100   |
| Post-transplant day    | 1 | 90.75 (79.40-96.60) | 87.50 (80.27-91.57) | -1.451 | 0.147   |
| Post-transplant days   | 2 | 89.20 (81.10-94.72) | 89.35 (83.70-93.20) | -0.015 | 0.988   |
| Post-transplant days   | 3 | 90.46 (85.85-94.20) | 88.33 (83.20-93.30) | -1.223 | 0.221   |
| Post-transplant days   | 7 | 84.50 (79.85-90.22) | 86.15 (80.45-92.40) | -0.855 | 0.393   |
| Post-transplant month  | 1 | 87.05 (83.87-90.75) | 86.28 (79.01-91.72) | -0.311 | 0.755   |
| Post-transplant months | 3 | 84.30 (82.32-88.98) | 84.00 (78.30-87.40) | -1.193 | 0.233   |
| Post-transplant months | 6 | 82.01 (79.32-87.42) | 82.01 (80.20-86.17) | -0.096 | 0.924   |

H, MFR

| Group                  |   | HLA 0-2 MM<br>n=20  | HLA 3-6 MM<br>n=92  | t/Z    | P-value |
|------------------------|---|---------------------|---------------------|--------|---------|
| Pre-transplant 1 day   |   | 7.90±5.18           | 9.75±4.70           | -1.569 | 0.120   |
| Post-transplant day    | 1 | 8.96±5.84           | 10.54±4.13          | -1.436 | 0.261   |
| Post-transplant days   | 2 | 9.15±4.58           | 9.42±4.22           | -0.253 | 0.800   |
| Post-transplant days   | 3 | 8.24±4.62           | 9.78±4.34           | -1.419 | 0.159   |
| Post-transplant days   | 7 | 12.16±6.03          | 11.43±5.79          | 0.508  | 0.613   |
| Post-transplant month  | 1 | 11.48±6.06          | 10.92±5.10          | 0.426  | 0.671   |
| Post-transplant months | 3 | 12.65 (8.75-14.07)  | 13.20 (10.60-15.02) | -1.333 | 0.182   |
| Post-transplant months | 6 | 13.03 (10.82-15.40) | 13.03 (11.20-14.40) | -0.264 | 0.792   |

I, HFR

| Group |  | HLA 0-2 MM | HLA 3-6 MM | Z | P-value |
|-------|--|------------|------------|---|---------|
|-------|--|------------|------------|---|---------|

|                        | n=20               | n=92             |        |       |
|------------------------|--------------------|------------------|--------|-------|
| Pre-transplant 1 day   | 1.10 (0.10-1.87)   | 1.5- (0.50-3.82) | -1.764 | 0.078 |
| Post-transplant day    | 1 0.75 (0.20-6.35) | 1.90 (0.80-5.90) | -1.547 | 0.122 |
| Post-transplant days   | 2 1.15 (0.35-6.00) | 1.60 (0.72-2.87) | -0.570 | 0.569 |
| Post-transplant days   | 3 1.20 (0.45-2.04) | 1.40 (0.70-3.67) | -1.315 | 0.188 |
| Post-transplant days   | 7 2.10 (0.92-4.82) | 1.80 (0.62-3.40) | -0.616 | 0.538 |
| Post-transplant month  | 1 1.90 (1.00-1.90) | 2.00 (0.92-5.85) | -0.547 | 0.584 |
| Post-transplant months | 3 2.40 (1.32-4.75) | 3.05 (1.82-6.72) | -1.311 | 0.190 |
| Post-transplant months | 6 2.60 (1.72-6.27) | 3.65 (2.00-4.85) | -0.294 | 0.768 |

#### J, RET-He

| Group                  | HLA 0-2 MM<br>n=20    | HLA 3-6 MM<br>n=92  | Z      | P-value |
|------------------------|-----------------------|---------------------|--------|---------|
| Pre-transplant 1 day   | 32.50 (29.22-33.55)   | 32.30 (30.05-33.25) | -0.319 | 0.750   |
| Post-transplant day    | 1 32.40 (30.07-33.57) | 31.90 (30.42-33.17) | -0.570 | 0.569   |
| Post-transplant days   | 2 31.29 (28.23-32.92) | 31.10 (29.74-32.40) | -0.015 | 0.988   |
| Post-transplant days   | 3 30.79 (28.82-32.66) | 30.75 (29.37-32.20) | -0.004 | 0.997   |
| Post-transplant days   | 7 33.40 (30.85-34.50) | 33.80 (31.40-34.77) | -0.665 | 0.506   |
| Post-transplant month  | 1 28.85 (27.72-31.85) | 30.65 (28.12-33.10) | -1.440 | 0.150   |
| Post-transplant months | 3 31.30 (27.62-34.00) | 31.20 (28.97-32.55) | -0.095 | 0.924   |
| Post-transplant months | 6 29.85 (27.70-31.77) | 29.92 (29.72-32.10) | -1.078 | 0.281   |

#### K, WBC

| Group                 | HLA 0-2 MM<br>n=20   | HLA 3-6 MM<br>n=92 | t/Z    | P-value |
|-----------------------|----------------------|--------------------|--------|---------|
| Pre-transplant 1 day  | 6.04 (5.49-9.41)     | 6.15 (4.82-7.73)   | -0.836 | 0.403   |
| Post-transplant day   | 1 13.74±5.01         | 12.17±4.17         | 1.473  | 0.144   |
| Post-transplant days  | 2 12.93 (8.84-16.71) | 11.64 (8.89-15.57) | -0.904 | 0.366   |
| Post-transplant days  | 3 10.68±3.95         | 9.97±4.15          | 0.699  | 0.486   |
| Post-transplant days  | 7 10.07±2.85         | 9.84±4.01          | 0.245  | 0.807   |
| Post-transplant month | 1 7.41 (5.82-9.08)   | 6.56 (4.96-8.60)   | -1.102 | 0.271   |
| Post-transplant       | 3 5.71 (3.94-8.99)   | 5.58 (4.03-6.82)   | -0.980 | 0.327   |

|                        |   |                  |                  |        |       |
|------------------------|---|------------------|------------------|--------|-------|
| months                 |   |                  |                  |        |       |
| Post-transplant months | 6 | 6.96 (5.74-8.05) | 6.96 (5.58-7.20) | -0.734 | 0.463 |

L, N%

| Group           |          | HLA 0-2 MM<br>n=20  | HLA 3-6 MM<br>n=92  | t/Z    | P-value |
|-----------------|----------|---------------------|---------------------|--------|---------|
| Pre-transplant  | 1 day    | 65.20 (57.97-74.05) | 66.05 (61.65-72.67) | -0.509 | 0.611   |
| Post-transplant | 1 day    | 96.85 (94.35-97.52) | 96.40 (94.92-97.70) | -0.175 | 0.861   |
| Post-transplant | 2 days   | 94.95 (93.72-96.75) | 95.95 (94.32-97.37) | -1.231 | 0.218   |
| Post-transplant | 3 days   | 94.95 (92.37-97.30) | 95.25 (92.25-96.85) | -0.163 | 0.870   |
| Post-transplant | 7 days   | 77.37±7.48          | 81.15±6.05          | -2.426 | 0.017   |
| Post-transplant | 1 month  | 69.08±13.3          | 71.11±12.47         | -0.653 | 0.515   |
| Post-transplant | 3 months | 62.67±13.28         | 63.94±15.36         | -0.342 | 0.733   |
| Post-transplant | 6 months | 65.01 (60.77-67.07) | 65.01 (63.25-71.87) | -1.372 | 0.170   |

M, N#

| Group           |          | HLA 0-2 MM<br>n=20 | HLA 3-6 MM<br>n=92 | t/Z    | P-value |
|-----------------|----------|--------------------|--------------------|--------|---------|
| Pre-transplant  | 1 day    | 3.97 (3.27-6.31)   | 4.00 (3.17-5.14)   | -0.676 | 0.499   |
| Post-transplant | 1 day    | 13.17±4.87         | 11.71±4.08         | 1.393  | 0.166   |
| Post-transplant | 2 days   | 12.43 (8.12-15.44) | 10.81 (8.20-14.66) | -0.839 | 0.401   |
| Post-transplant | 3 days   | 9.95 (6.64-12.96)  | 8.64 (6.21-12.23)  | -0.764 | 0.445   |
| Post-transplant | 7 days   | 7.92±2.40          | 8.13±3.58          | -0.251 | 0.802   |
| Post-transplant | 1 month  | 4.97 (4.01-7.03)   | 4.35 (3.21-6.46)   | -0.877 | 0.380   |
| Post-transplant | 3 months | 4.27±2.58          | 3.65±1.96          | 1.220  | 0.225   |
| Post-transplant | 6 months | 4.72 (3.37-5.63)   | 4.72 (3.70-5.12)   | -0.271 | 0.786   |

N, L%

| Group           |        | HLA 0-2 MM<br>n=20 | HLA 3-6 MM<br>n=92 | t/Z    | P-value |
|-----------------|--------|--------------------|--------------------|--------|---------|
| Pre-transplant  | 1 day  | 23.10±10.07        | 22.01±7.57         | 0.544  | 0.588   |
| Post-transplant | 1 day  | 0.95 (0.50-1.30)   | 0.80 (0.50-1.30)   | -0.297 | 0.766   |
| Post-transplant | 2 days | 0.80 (0.42-1.25)   | 0.90 (0.60-1.37)   | -0.700 | 0.484   |
| Post-transplant | 3 days | 1.10 (0.65-1.77)   | 1.10 (0.70-1.77)   | -0.601 | 0.548   |

|                        |   |                     |                     |        |       |
|------------------------|---|---------------------|---------------------|--------|-------|
| Post-transplant days   | 7 | 8.00 (4.95-15.00)   | 6.30 (4.37-9.37)    | -1.918 | 0.055 |
| Post-transplant month  | 1 | 22.01±7.57          | 17.80±10.70         | 1.703  | 0.091 |
| Post-transplant months | 3 | 25.30 (16.22-34.37) | 22.12 (14.70-29.25) | -1.064 | 0.288 |
| Post-transplant months | 6 | 21.86 (20.32-29.95) | 21.86 (16.37-24.07) | -1.372 | 0.170 |

O, L#

| Group                  |   | HLA 0-2 MM<br>n=20 | HLA 3-6 MM<br>n=92 | t/Z    | P-value |
|------------------------|---|--------------------|--------------------|--------|---------|
| Pre-transplant 1 day   |   | 1.50 (1.14-1.92)   | 1.30 (0.93-1.61)   | -1.368 | 0.171   |
| Post-transplant day    | 1 | 0.11 (0.07-0.19)   | 0.10 (0.06-0.14)   | -0.784 | 0.433   |
| Post-transplant days   | 2 | 0.09 (0.06-0.15)   | 0.10 (0.07-0.15)   | -0.472 | 0.637   |
| Post-transplant days   | 3 | 0.09 (0.06-0.17)   | 0.10 (0.06-0.17)   | -0.301 | 0.764   |
| Post-transplant days   | 7 | 0.88 (0.46-1.34)   | 0.58 (0.36-0.84)   | -2.173 | 0.030   |
| Post-transplant month  | 1 | 1.24 (0.98-2.19)   | 1.09 (0.61-1.58)   | -2.040 | 0.041   |
| Post-transplant months | 3 | 1.56 (0.99-2.25)   | 1.11 (0.74-1.67)   | -1.953 | 0.051   |
| Post-transplant months | 6 | 1.57 (1.25-1.98)   | 1.36 (0.96-1.50)   | -2.504 | 0.012   |

HLA, human leukocyte antigen; Scr, serum creatinine; eGFR, estimated glomerular filtration rate; GLU, blood glucose; RET%, percentages of reticulocytes; RET#, absolute reticulocyte number; RET-He, reticulocyte haemoglobin content; LFR, low-fluorescence intensity reticulocytes; MFR, medium-fluorescence intensity reticulocytes; HFR, high-fluorescence intensity reticulocytes; WBC, white blood cell count; N%, the percentage of neutrophils; N#, the absolute number of neutrophils; L%, the percentage of lymphocytes; L#, the absolute number of lymphocytes.

Table SIV. Statistical description of Hb in patients categorized by the HLA matching

| Hb                        | HLA 0-2 MM<br>Female n=8 | HLA 3-6 MM<br>Female n=20 | t/Z    | P-<br>value | HLA 0-2 MM<br>Male n=72 | HLA 3-6 MM<br>Male n=12 | t/Z    | P-<br>value |
|---------------------------|--------------------------|---------------------------|--------|-------------|-------------------------|-------------------------|--------|-------------|
| Pre-transplant<br>1 day   | 88.25±20.26              | 101.30±19.65<br>8         | 1.574  | 0.128       | 109.79±22.23            | 108.08±25.50            | 0.241  | 0.810       |
| Post-transplant<br>1 day  | 1 85 (74.50-92)          | 87.5 (75.50-104.75)       | -0.433 | 0.665       | 99.50 (87-118)          | 99 (86-114)             | -0.096 | 0.924       |
| Post-transplant<br>days   | 2 81.75±14.99            | 91.35±28.33               | 0.902  | 0.375       | 100.29±18.03            | 101.58±27.82            | -0.211 | 0.833       |
| Post-transplant<br>days   | 3 86.50±8.38             | 86.75±14.38               | 0.046  | 0.964       | 100.01±18.08            | 105.33±27.92            | -0.867 | 0.389       |
| Post-transplant<br>days   | 7 85 (78-98.25)          | 81.5 (74.25-91.50)        | -0.942 | 0.346       | 105.50 (88-120.75)      | 95.50 (89-130)          | -0.109 | 0.913       |
| Post-transplant<br>month  | 1 96.75±7.68             | 87.66±17.58               | -1.398 | 0.174       | 101.54±20.41            | 112.08±25.74            | -1.594 | 0.115       |
| Post-transplant<br>months | 3 102.75±15.02           | 107.55±23.58              | 0.531  | 0.600       | 119.78±19.94            | 111.64±22.90            | 1.282  | 0.203       |
| Post-transplant<br>months | 6 109.5 (93.25-124.75)   | 127 (120.75-127)          | -1.758 | 0.079       | 127 (117.50-139.75)     | 129 (127-144)           | -0.641 | 0.521       |

Hb, hemoglobin; HLA, human leukocyte antigen.

Table SV. Markers in patients categorized by CDC-XM level and HLA matching.

| A, Scr                      |                     |                 |                      |                 |                      |                  |        |       |         |       |        |
|-----------------------------|---------------------|-----------------|----------------------|-----------------|----------------------|------------------|--------|-------|---------|-------|--------|
| Group                       | Group 1<br>n=16     |                 | Group 2a<br>n=20     |                 | Group 2b<br>n=76     |                  | F/K    | P     | P-value |       |        |
|                             |                     |                 |                      |                 |                      |                  |        |       | 1vs2a   | 1vs2b | 2avs2b |
| Pre-transplant<br>1 day     | 972.61±294.82       |                 | 529.3±270.97         |                 | 799.65±330.15        |                  | 1.974  | 0.144 | -       | -     | -      |
| Post-transplant<br>1 day    | 1039.6              | (878.07-1203.1) | 534.6 (282.9-605.7)  |                 | 749.3                | (5551.35-1036.3) | 16.609 | 0.000 | 0.000   | 0.135 | 0.006  |
| Post-transplant<br>2 days   | 832.75              | (535.2-1015.9)  | 210.9 (141.57-284.2) |                 | 463.7                | (247.67-861.12)  | 24.178 | 0.000 | 0.000   | 0.162 | 0.000  |
| Post-transplant<br>3 days   | 524.25              | (313.75-910.35) | 138.25               | (106.35-176.25) | 272.6 (161.1-608.15) |                  | 25.619 | 0.000 | 0.000   | 0.102 | 0.000  |
| Post-transplant<br>7 days   | 243.55              | (142.9-355.07)  | 111.9 (83.92-156.85) |                 | 184.15               | (119.55-348.7)   | 17.365 | 0.000 | 0.001   | 0.532 | 0.000  |
| Post-transplant<br>1 month  | 179.50              | (135.25-362.85) | 139.5 (96.5-184.97)  |                 | 171.50               | (121.12-243.75)  | 4.941  | 0.085 | -       | -     | -      |
| Post-transplant<br>3 months | 162.50              | (122.25-184.25) | 133.50               | (95.75-157.27)  | 140.20               | (117.25-165.84)  | 3.682  | 0.159 | -       | -     | -      |
| Post-transplant<br>6 months | 144.42              | (144.42-164.75) | 137 (104.75-144.42)  |                 | 144.42               | (122.25-161.50)  | 3.844  | 0.146 | -       | -     | -      |
| B, Urea                     |                     |                 |                      |                 |                      |                  |        |       |         |       |        |
| Group                       | Group 1<br>n=16     |                 | Group 2a<br>n=20     |                 | Group 2b<br>n=76     |                  | F/K    | P     | P-value |       |        |
|                             |                     |                 |                      |                 |                      |                  |        |       | 1vs2a   | 1vs2b | 2avs2b |
| Pre-transplant<br>1 day     | 20.79±6.72          |                 | 21.39±8.72           |                 | 20.52±7.04           |                  | 0.113  | 0.893 | -       | -     | -      |
| Post-transplant<br>1 day    | 26.01±6.30          |                 | 21.01±6.29           |                 | 24.06±7.28           |                  | 2.451  | 0.091 | -       | -     | -      |
| Post-transplant<br>2 days   | 27.88 (20.83-36.25) |                 | 15.07 (11.05-19.05)  |                 | 26.46 (19.07-33.52)  |                  | 17.654 | 0.000 | 0.001   | 0.901 | 0.000  |
| Post-transplant<br>3 days   | 28.27 (22.15-38.91) |                 | 12.98 (11.05-19.05)  |                 | 23.55 (16.06-36.3)   |                  | 18.875 | 0.000 | 0.000   | 0.589 | 0.000  |
| Post-transplant<br>7 days   | 23.20 (15.69-46.09) |                 | 13.93 (10.80-15.80)  |                 | 19.06 (12.68-33.47)  |                  | 12.378 | 0.002 | 0.003   | 0.503 | 0.011  |
| Post-transplant<br>1 month  | 13.81 (9.96-25.03)  |                 | 9.97 (8.19-12.12)    |                 | 10.80 (7.65-18.22)   |                  | 2.024  | 0.364 | -       | -     | -      |
| Post-transplant<br>3 months | 8.52 (7.40-15.28)   |                 | 9.19 (7.51-11.09)    |                 | 9.26 (7.11-12.02)    |                  | 0.408  | 0.815 | -       | -     | -      |
| Post-transplant<br>6 months | 9.48 (8.05-9.48)    |                 | 9.48 (7.28-10.74)    |                 | 9.48 (6.67-11.17)    |                  | 0.511  | 0.775 | -       | -     | -      |
| C, eGFR                     |                     |                 |                      |                 |                      |                  |        |       |         |       |        |
| Group                       | Group 1<br>n=16     |                 | Group 2a<br>n=20     |                 | Group 2b<br>n=76     |                  | F/K    | P     | P-value |       |        |
|                             |                     |                 |                      |                 |                      |                  |        |       | 1vs2a   | 1vs2b | 2avs2b |
| Pre-transplant<br>1 day     | 5.00 (4.00-7.00)    |                 | 6.00 (5.00-9.00)     |                 | 6.00 (4.00-7.00)     |                  | 3.563  | 0.168 | -       | -     | -      |
| Post-transplant<br>1 day    | 5.00 (4.00-6.75)    |                 | 11.50 (8.00-20.25)   |                 | 7.00 (5.00-11.00)    |                  | 14.167 | 0.001 | 0.001   | 0.452 | 0.005  |
| Post-transplant<br>2 days   | 6.00 (5.25-12.25)   |                 | 36.00 (24.25-46.75)  |                 | 11.50 (5.25-27.00)   |                  | 22.231 | 0.000 | 0.000   | 0.364 | 0.000  |
| Post-transplant<br>3 days   | 11.50 (6.00-23.00)  |                 | 56.00 (41.50-71.50)  |                 | 24.00 (7.00-46.75)   |                  | 22.979 | 0.000 | 0.000   | 0.229 | 0.000  |

|                             |                     |                     |                     |        |       |       |       |       |
|-----------------------------|---------------------|---------------------|---------------------|--------|-------|-------|-------|-------|
| Post-transplant<br>7 days   | 31.50 (17.25-58.00) | 73.00 (46.50-92.50) | 35.50 (17.00-70.00) | 14.597 | 0.001 | 0.002 | 0.964 | 0.002 |
| Post-transplant<br>1 month  | 40.51±20.96         | 57.30±23.48         | 47.70±28.01         | 1.876  | 0.158 | -     | -     | -     |
| Post-transplant<br>3 months | 52.40±18.85         | 60.29±20.45         | 59.08±23.43         | 0.682  | 0.508 | -     | -     | -     |
| Post-transplant<br>6 months | 58.90 (48.25-58.80) | 58.80 (48.50-70.50) | 58.80 (46.25-65.25) | 0.902  | 0.637 | -     | -     | -     |

---

CDC-XM, complement-dependent cytotoxicity crossmatch; HLA, human leukocyte antigen; Scr, serum creatinine; eGFR, estimated glomerular filtration rate.

---

Table SVI. Markers in patients categorized in patients categorized by HLA-A locus mismatch.

| A, Scr                      |                     |                 |                     |                 |                     |                  |        |       |         |       |       |
|-----------------------------|---------------------|-----------------|---------------------|-----------------|---------------------|------------------|--------|-------|---------|-------|-------|
| Group                       | HLA-A 0 MM<br>n=12  |                 | HLA-A 1 MM<br>n=72  |                 | HLA-A 2 MM<br>n=28  |                  | F/K    | P     | P-value |       |       |
|                             |                     |                 |                     |                 |                     |                  |        |       | 0vs1    | 0vs2  | 1vs2  |
| Pre-transplant<br>1 day     | 861.70±329.11       |                 | 900.13±278.39       |                 | 992.69±232.36       |                  | 1.451  | 0.239 | -       | -     | -     |
| Post-transplant<br>1 day    | 554.80              | (301.22-752.42) | 722.05              | (463.57-946.95) | 979                 | (765.75-1167.40) | 17.379 | 0.000 | 0.417   | 0.001 | 0.001 |
| Post-transplant<br>2 days   | 194.15              | (144.10-386.80) | 362.90              | (219.55-649.30) | 869.9               | (679.15-1033.72) | 32.843 | 0.000 | 0.127   | 0.000 | 0.000 |
| Post-transplant<br>3 days   | 144.25              | (110.57-266.32) | 218.75              | (153.70-392.70) | 721.30              | (436.42-909.65)  | 32.721 | 0.000 | 0.210   | 0.000 | 0.000 |
| Post-transplant<br>7 days   | 107.20              | (79.02-177.77)  | 141.90              | (111.42-237.50) | 310.60              | (204.15-659.42)  | 22.374 | 0.000 | 0.181   | 0.000 | 0.000 |
| Post-transplant<br>1 month  | 147.00              | (106.25-290.80) | 158.90              | (116.45-213.17) | 184.00              | (141.27-314.42)  | 2.785  | 0.248 | -       | -     | -     |
| Post-transplant<br>3 months | 141.00              | (99.25-164.00)  | 138.50              | (114.05-162.87) | 157.00              | (107.57-191.00)  | 2.068  | 0.356 | -       | -     | -     |
| Post-transplant<br>6 months | 137.00              | (104.75-144.42) | 144.42              | (115.25-154.92) | 146.71              | (144.42-188.50)  | 8.016  | 0.018 | 1.000   | 0.061 | 0.036 |
| B, Urea                     |                     |                 |                     |                 |                     |                  |        |       |         |       |       |
| Group                       | HLA-A 0 MM<br>n=12  |                 | HLA-A 1 MM<br>n=72  |                 | HLA-A 2 MM<br>n=28  |                  | F/K    | P     | P-value |       |       |
|                             |                     |                 |                     |                 |                     |                  |        |       | 0vs1    | 0vs2  | 1vs2  |
| Pre-transplant<br>1 day     | 22.44±7.66          |                 | 19.85±7.67          |                 | 22.19±5.68          |                  | 1.445  | 0.240 | -       | -     | -     |
| Post-transplant<br>1 day    | 22.40±6.17          |                 | 22.71±6.80          |                 | 27.19±7.28          |                  | 4.558  | 0.013 | 1.000   | 0.138 | 0.013 |
| Post-transplant<br>2 days   | 15.07 (12.55-22.40) |                 | 21.50 (16.84-28.91) |                 | 33.66 (30.13-36.84) |                  | 31.139 | 0.000 | 0.229   | 0.000 | 0.000 |
| Post-transplant<br>3 days   | 12.55 (11.05-22.10) |                 | 19.35 (14.91-26.55) |                 | 36.72 (31.41-41.53) |                  | 37.075 | 0.000 | 0.247   | 0.000 | 0.000 |
| Post-transplant<br>7 days   | 11.95 (8.64-17.54)  |                 | 14.83 (12.33-22.81) |                 | 33.16 (25.32-48.73) |                  | 30.545 | 0.000 | 0.193   | 0.000 | 0.000 |
| Post-transplant<br>1 month  | 10.21 (8.69-15.98)  |                 | 9.59 (7.42-13.67)   |                 | 15.73 (10.43-20.98) |                  | 8.902  | 0.012 | 1.000   | 0.552 | 0.009 |
| Post-transplant<br>3 months | 9.19 (7.36-12.40)   |                 | 8.49 (7.24-11.33)   |                 | 11.55 (7.62-16.78)  |                  | 5.221  | 0.073 | -       | -     | -     |
| Post-transplant<br>6 months | 9.48 (6.18-11.21)   |                 | 9.48 (6.67-10.15)   |                 | 9.48 (9.00-12.86)   |                  | 5.926  | 0.052 | -       | -     | -     |
| C, eGFR                     |                     |                 |                     |                 |                     |                  |        |       |         |       |       |
| Group                       | HLA-A 0 MM<br>n=12  |                 | HLA-A 1 MM<br>n=72  |                 | HLA-A 2 MM<br>n=28  |                  | F/K    | P     | P-value |       |       |
|                             |                     |                 |                     |                 |                     |                  |        |       | 0vs1    | 0vs2  | 1vs2  |
| Pre-transplant<br>1 day     | 6.50 (4.25-9.00)    |                 | 6.00 (5.00-7.00)    |                 | 5.00 (4.00-6.00)    |                  | 7.323  | 0.026 | 1.000   | 0.111 | 0.038 |
| Post-transplant<br>1 day    | 11.00 (7.25-17.75)  |                 | 8.00 (5.00-13.00)   |                 | 5.00 (4.00-6.00)    |                  | 24.492 | 0.000 | 0.512   | 0.000 | 0.000 |
| Post-transplant<br>2 days   | 38.50 (15.75-45.75) |                 | 19.00 (9.25-33.75)  |                 | 5.50 (4.25-7.00)    |                  | 36.378 | 0.000 | 0.165   | 0.000 | 0.000 |
| Post-transplant<br>3 days   | 52.00 (26.50-63.50) |                 | 33.50 (16.00-51.00) |                 | 7.00 (6.00-13.75)   |                  | 34.745 | 0.000 | 0.261   | 0.000 | 0.000 |

|                             |                     |                     |                     |        |       |       |       |       |
|-----------------------------|---------------------|---------------------|---------------------|--------|-------|-------|-------|-------|
| Post-transplant<br>7 days   | 80.00 (43.50-90.25) | 56.50 (30.25-74.00) | 21.00 (7.25-35.00)  | 24.214 | 0.000 | 0.262 | 0.000 | 0.000 |
| Post-transplant<br>1 month  | 49.50±23.58         | 51.32±26.42         | 40.39±27.51         | 1.733  | 0.182 | -     | -     | -     |
| Post-transplant<br>3 months | 58.50 (44.25-68.00) | 56.00 (48.00-74.25) | 48.00 (34.25-69.50) | 3.181  | 0.204 | -     | -     | -     |
| Post-transplant<br>6 months | 58.80 (46.25-70.50) | 58.80 (50.50-66.00) | 53.90 (40.25-58.80) | 6.364  | 0.042 | 1.000 | 0.331 | 0.040 |

---

HLA, human leukocyte antigen; Scr, serum creatinine; eGFR, estimated glomerular filtration rate.

Table SVII. Markers in patients in patients categorized by HLA-B locus mismatch

| A, Scr                      |                     |                    |                     |                               |                     |       |        |       |         |       |       |
|-----------------------------|---------------------|--------------------|---------------------|-------------------------------|---------------------|-------|--------|-------|---------|-------|-------|
| Group                       | HLA-B 0 MM<br>n=7   |                    | HLA-B 1 MM<br>n=53  |                               | HLA-B 2 MM<br>n=52  |       | F/K    | P     | P-value |       |       |
|                             |                     |                    |                     |                               |                     |       |        |       | 0vs1    | 0vs2  | 1vs2  |
| Pre-transplant<br>1 day     | 942.44±280.05       |                    | 818.13±260.21       |                               | 1018.98±254.94      |       | 7.928  | 0.001 | 0.705   | 1.000 | 0.000 |
| Post-transplant<br>1 day    | 599.30<br>986.60)   | (398.10-<br>558.90 | (391.70-<br>762.95) | 966<br>(749.05-<br>1174.80)   | 32.081              | 0.000 | 1.000  | 0.107 | 0.000   |       |       |
| Post-transplant<br>2 days   | 240.30<br>728.10)   | (163.60-<br>255.70 | (204.70-<br>462.05) | 749.9<br>(502.87-<br>1078.97) | 36.014              | 0.000 | 1.000  | 0.025 | 0.000   |       |       |
| Post-transplant<br>3 days   | 141.00<br>551.00)   | (128.50-<br>180.80 | (137.80-<br>278.20) | 541.70<br>(306.05-<br>866.57) | 32.390              | 0.000 | 1.000  | 0.023 | 0.000   |       |       |
| Post-transplant<br>7 days   | 123.60<br>204.60)   | (83.00-<br>129.90  | (104.85-<br>198.05) | 236.85<br>(145.62-<br>517.92) | 20.120              | 0.000 | 1.000  | 0.052 | 0.000   |       |       |
| Post-transplant<br>1 month  | 182.80<br>189.00)   | (104.00-<br>148.00 | (117.90-<br>203.50) | 178.00<br>(130.25-<br>337.50) | 3.074               | 0.215 | -      | -     | -       |       |       |
| Post-transplant<br>3 months | 127.00<br>157.70)   | (87.10-<br>141.00  | (114.70-<br>163.50) | 147.50<br>(112.42-<br>178.75) | 1.175               | 0.556 | -      | -     | -       |       |       |
| Post-transplant<br>6 months | 144.42<br>159.00)   | (92.00-<br>140.00  | (116.00-<br>155.00) | 144.42<br>(130.75-<br>168.75) | 2.233               | 0.327 | -      | -     | -       |       |       |
| B, Urea                     |                     |                    |                     |                               |                     |       |        |       |         |       |       |
| Group                       | HLA-B 0 MM<br>n=7   |                    | HLA-B 1 MM<br>n=53  |                               | HLA-B 2 MM<br>n=52  |       | F/K    | P     | P-value |       |       |
|                             |                     |                    |                     |                               |                     |       |        |       | 0vs1    | 0vs2  | 1vs2  |
| Pre-transplant<br>1 day     | 26.50±10.09         |                    | 18.91±7.44          |                               | 21.77±6.09          |       | 4.704  | 0.011 | 0.025   | 0.294 | 0.118 |
| Post-transplant<br>1 day    | 24.56±5.91          |                    | 21.10±6.22          |                               | 26.44±7.13          |       | 8.513  | 0.000 | 0.597   | 1.000 | 0.000 |
| Post-transplant<br>2 days   | 21.07 (14.97-33.73) |                    | 19.23 (15.07-25.32) |                               | 31.30 (23.85-36.40) |       | 33.893 | 0.000 | 1.000   | 0.108 | 0.000 |
| Post-transplant<br>3 days   | 18.87 (11.50-28.93) |                    | 18.00 (12.98-23.20) |                               | 32.77 (22.63-40.77) |       | 31.485 | 0.000 | 1.000   | 0.059 | 0.000 |
| Post-transplant<br>7 days   | 14.61 (13.71-14.81) |                    | 13.90 (11.50-18.91) |                               | 29.82 (17.38-49.41) |       | 26.659 | 0.000 | 1.000   | 0.043 | 0.000 |
| Post-transplant<br>1 month  | 11.66 (8.77-24.63)  |                    | 9.80 (7.53-12.97)   |                               | 14.09 (8.62-21.90)  |       | 6.862  | 0.032 | 0.663   | 1.000 | 0.033 |
| Post-transplant<br>3 months | 7.99 (7.60-10.25)   |                    | 9.30 (7.51-11.38)   |                               | 9.31 (7.11-13.62)   |       | 0.164  | 0.921 | -       | -     | -     |
| Post-transplant<br>6 months | 6.99 (5.32-9.48)    |                    | 9.48 (7.00-10.26)   |                               | 9.48 (7.98-11.83)   |       | 3.964  | 0.138 | -       | -     | -     |
| C, eGFR                     |                     |                    |                     |                               |                     |       |        |       |         |       |       |
| Group                       | HLA-B 0 MM<br>n=7   |                    | HLA-B 1 MM<br>n=53  |                               | HLA-B 2 MM<br>n=52  |       | F/K    | P     | P-value |       |       |
|                             |                     |                    |                     |                               |                     |       |        |       | 0vs1    | 0vs2  | 1vs2  |
| Pre-transplant<br>1 day     | 6.00 (4.00-6.00)    |                    | 6.00 (5.00-9.00)    |                               | 5.00 (4.00-6.00)    |       | 21.291 | 0.000 | 0.553   | 1.000 | 0.000 |
| Post-transplant<br>1 day    | 10.00 (5.00-12.00)  |                    | 11.00 (7.00-16.50)  |                               | 5.00 (4.00-6.75)    |       | 36.522 | 0.000 | 1.000   | 0.124 | 0.000 |
| Post-transplant<br>2 days   | 31.00 (7.00-39.00)  |                    | 27.00 (13.50-38.00) |                               | 6.00 (5.00-11.00)   |       | 39.001 | 0.000 | 1.000   | 0.037 | 0.000 |
| Post-transplant<br>3 days   | 49.00 (10.00-60.00) |                    | 41.00 (25.00-59.00) |                               | 10.00 (6.00-23.00)  |       | 32.912 | 0.000 | 1.000   | 0.045 | 0.000 |

|                             |                     |                     |                     |        |       |       |       |       |
|-----------------------------|---------------------|---------------------|---------------------|--------|-------|-------|-------|-------|
| Post-transplant<br>7 days   | 64.00 (35.00-93.00) | 61.00 (35.50-82.00) | 26.00 (10.50-50.00) | 21.203 | 0.000 | 1.000 | 0.088 | 0.000 |
| Post-transplant<br>1 month  | 48.71±23.48         | 53.60±25.36         | 43.04±27.60         | 2.110  | 0.126 | -     | -     | -     |
| Post-transplant<br>3 months | 62.00 (48.00-81.00) | 58.00 (48.00-70.50) | 52.00 (40.49-76.40) | 1.322  | 0.516 | -     | -     | -     |
| Post-transplant<br>6 months | 58.80 (47.00-75.00) | 58.80 (49.00-69.00) | 58.80 (42.50-61.00) | 1.280  | 0.527 | -     | -     | -     |

---

HLA, human leukocyte antigen; Scr, serum creatinine; eGFR, estimated glomerular filtration rate.

---

Table SVIII. Markers in patients categorized by HLA-DR locus mismatch

| A, Scr                      |                     |                 |                     |                 |                     |                  |        |       |         |       |       |
|-----------------------------|---------------------|-----------------|---------------------|-----------------|---------------------|------------------|--------|-------|---------|-------|-------|
| Group                       | HLA-DR 0 MM<br>n=11 |                 | HLA-DR 1 MM<br>n=65 |                 | HLA-DR 2 MM<br>n=36 |                  | F/K    | P     | P-value |       |       |
|                             |                     |                 |                     |                 |                     |                  |        |       | 0vs1    | 0vs2  | 1vs2  |
| Pre-transplant<br>1 day     | 874.52±283.92       |                 | 916.97±262.16       |                 | 936.72±299.09       |                  | 0.218  | 0.805 | -       | -     | -     |
| Post-transplant<br>1 day    | 606.60              | (483.50-986.60) | 734.80              | (470.80-962.80) | 891.4               | (573.10-1175.70) | 3.730  | 0.155 | -       | -     | -     |
| Post-transplant<br>2 days   | 417.10              | (219.10-728.10) | 355.00              | (213.45-655.95) | 738.85              | (372.47-946.17)  | 6.702  | 0.035 | 1.000   | 0.405 | 0.034 |
| Post-transplant<br>3 days   | 303.30              | (128.50-438.80) | 216.30              | (147.70-443.75) | 458.95              | (221.82-835.15)  | 9.343  | 0.009 | 1.000   | 0.245 | 0.008 |
| Post-transplant<br>7 days   | 143.50              | (96.70-204.60)  | 141.90              | (106.05-269.05) | 215.20              | (133.65-399.70)  | 6.272  | 0.043 | 1.000   | 0.196 | 0.068 |
| Post-transplant<br>1 month  | 152.00              | (115.00-262.00) | 168.00              | (119.00-211.55) | 173.50              | (117.25-312.40)  | 0.509  | 0.775 | -       | -     | -     |
| Post-transplant<br>3 months | 151.00              | (112.00-166.00) | 141.00              | (119.35-164.69) | 147.50              | (94.25-179.00)   | 0.030  | 0.985 | -       | -     | -     |
| Post-transplant<br>6 months | 149.00              | (119.00-169.00) | 140.00              | (116.00-155.00) | 144.42              | (126.50-161.75)  | 1.714  | 0.424 | -       | -     | -     |
| B, Urea                     |                     |                 |                     |                 |                     |                  |        |       |         |       |       |
| Group                       | HLA-DR 0 MM<br>n=11 |                 | HLA-DR 1 MM<br>n=65 |                 | HLA-DR 2 MM<br>n=36 |                  | F/K    | P     | P-value |       |       |
|                             |                     |                 |                     |                 |                     |                  |        |       | 0vs1    | 0vs2  | 1vs2  |
| Pre-transplant<br>1 day     | 24.49±8.48          |                 | 19.71±7.07          |                 | 21.37±6.96          |                  | 2.308  | 0.104 | -       | -     | -     |
| Post-transplant<br>1 day    | 25.46±5.73          |                 | 22.84±7.05          |                 | 25.01±7.38          |                  | 1.435  | 0.243 | -       | -     | -     |
| Post-transplant<br>2 days   | 25.17±7.80          |                 | 23.41±9.06          |                 | 28.54±9.81          |                  | 3.600  | 0.031 | 0.558   | 0.290 | 0.008 |
| Post-transplant<br>3 days   | 22.00 (12.21-30.82) |                 | 19.24 (14.05-30.10) |                 | 29.95 (20.73-40.32) |                  | 11.955 | 0.003 | 1.000   | 0.236 | 0.002 |
| Post-transplant<br>7 days   | 14.61 (12.58-26.34) |                 | 14.81 (11.67-25.05) |                 | 26.03 (15.35-41.55) |                  | 9.189  | 0.010 | 1.000   | 0.246 | 0.009 |
| Post-transplant<br>1 month  | 10.90 (8.88-15.04)  |                 | 10.18 (7.51-14.49)  |                 | 14.64 (7.69-20.90)  |                  | 3.214  | 0.200 | -       | -     | -     |
| Post-transplant<br>3 months | 8.87 (7.98-11.87)   |                 | 9.22 (7.25-11.83)   |                 | 8.88 (7.19-13.62)   |                  | 0.247  | 0.884 | -       | -     | -     |
| Post-transplant<br>6 months | 9.48 (8.17-12.78)   |                 | 9.48 (6.54-10.20)   |                 | 9.48 (8.16-10.76)   |                  | 2.125  | 0.346 | -       | -     | -     |
| C, eGFR                     |                     |                 |                     |                 |                     |                  |        |       |         |       |       |
| Group                       | HLA-DR 0 MM<br>n=11 |                 | HLA-DR 1 MM<br>n=65 |                 | HLA-DR 2 MM<br>n=36 |                  | F/K    | P     | P-value |       |       |
|                             |                     |                 |                     |                 |                     |                  |        |       | 0vs1    | 0vs2  | 1vs2  |
| Pre-transplant<br>1 day     | 6.00 (4.00-9.00)    |                 | 6.00 (4.50-7.00)    |                 | 5.00 (4.00-6.75)    |                  | 3.215  | 0.200 | -       | -     | -     |
| Post-transplant<br>1 day    | 8.00 (5.00-13.00)   |                 | 8.00 (5.00-12.00)   |                 | 6.00 (5.00-17.50)   |                  | 5.982  | 0.050 | -       | -     | -     |
| Post-transplant<br>2 days   | 13.00 (8.50-34.50)  |                 | 19.00 (8.50-34.50)  |                 | 6.00 (5.0--17.50)   |                  | 7.727  | 0.021 | 1.000   | 0.394 | 0.019 |
| Post-transplant<br>3 days   | 19.00 (11.00-60.00) |                 | 34.00 (13.50-51.50) |                 | 11.50 (6.00-28.00)  |                  | 9.838  | 0.007 | 1.000   | 0.228 | 0.006 |

|                             |                     |                     |                     |       |       |       |       |       |
|-----------------------------|---------------------|---------------------|---------------------|-------|-------|-------|-------|-------|
| Post-transplant<br>7 days   | 57.00 (32.00-88.00) | 56.00 (25.50-77.00) | 35.00 (16.25-57.25) | 6.507 | 0.039 | 1.000 | 0.241 | 0.050 |
| Post-transplant<br>1 month  | 47.45±27.90         | 50.19±24.54         | 45.43±30.08         | 0.375 | 0.688 | -     | -     | -     |
| Post-transplant<br>3 months | 57.25±16.63         | 48.58±20.01         | 58.25±27.64         | 0.301 | 0.860 | -     | -     | -     |
| Post-transplant<br>6 months | 53.00 (47.00-59.00) | 58.80 (48.50-69.00) | 58.80 (46.25-64.75) | 1.788 | 0.409 | -     | -     | -     |

---

HLA, human leukocyte antigen; Scr, serum creatinine; eGFR, estimated glomerular filtration rate.

---

Table SIX. Markers in patients categorized by ABO compatibility.

| A, Scr                   |                        |                         |        |         |
|--------------------------|------------------------|-------------------------|--------|---------|
| Group                    | ABOi<br>n=6            | ABOc<br>n=106           | t/Z    | P-value |
| Pre-transplant 1 day     | 832.16±200.49          | 924.08±278.09           | -0.796 | 0.428   |
| Post-transplant 1 day    | 562.80 (369.45-683.55) | 750.00 (516.85-1071.75) | -1.693 | 0.091   |
| Post-transplant 2 days   | 255.40 (201.25-444.42) | 463.75 (229.40-855.75)  | -1.344 | 0.179   |
| Post-transplant 3 days   | 196.10 (147.37-391.20) | 291.80 (154.97-605.05)  | -0.840 | 0.401   |
| Post-transplant 7 days   | 127.30 (119.80-260.20) | 168.65 (109.87-318.87)  | -0.465 | 0.642   |
| Post-transplant 1 month  | 173.00 (121.85-339.01) | 168.50 (117.95-227.10)  | -0.362 | 0.717   |
| Post-transplant 3 months | 149.50 (128.50-285.72) | 141.00 (109.25-166.50)  | -1.273 | 0.203   |
| Post-transplant 6 months | 149.21 (144.42-155.40) | 144.42 (116.00-160.25)  | -1.190 | 0.234   |
| B, Urea                  |                        |                         |        |         |
| Group                    | ABOi<br>n=6            | ABOc<br>n=106           | t/Z    | P-value |
| Pre-transplant 1 day     | 22.52±5.02             | 20.61±7.37              | 0.624  | 0.534   |
| Post-transplant 1 day    | 22.99±3.47             | 23.84±7.24              | -0.286 | 0.776   |
| Post-transplant 2 days   | 20.47 (18.18-25.02)    | 24.97 (17.70-33.22)     | -0.930 | 0.352   |
| Post-transplant 3 days   | 19.10 (15.08-30.23)    | 22.72 (15.11-33.95)     | -0.446 | 0.656   |
| Post-transplant 7 days   | 14.01 (10.52-33.71)    | 18.13 (12.89-31.21)     | -0.640 | 0.522   |
| Post-transplant 1 month  | 9.72 (5.86-17.94)      | 10.97 (8.07-17.18)      | -0.607 | 0.544   |
| Post-transplant 3 months | 8.36 (6.39-14.26)      | 9.20 (7.38-12.01)       | -0.394 | 0.693   |
| Post-transplant 6 months | 8.51 (6.96-9.48)       | 9.48 (7.09-10.59)       | -0.982 | 0.326   |
| C, eGFR                  |                        |                         |        |         |
| Group                    | ABOi<br>n=6            | ABOc<br>n=106           | t/Z    | P-value |
| Pre-transplant 1 day     | 7.00 (5.75-7.50)       | 6.00 (4.00-7.00)        | -1.452 | 0.147   |
| Post-transplant 1 day    | 11.00 (9.00-15.50)     | 7.00 (5.00-12.00)       | -1.754 | 0.079   |
| Post-transplant 2 days   | 28.00 (16.50-38.25)    | 12.00 (6.00-31.00)      | -1.378 | 0.168   |
| Post-transplant 3 days   | 37.50 (21.00-52.25)    | 23.00 (8.75-49.50)      | -0.789 | 0.430   |
| Post-transplant 7 days   | 54.00 (30.75-69.00)    | 43.50 (21.00-72.75)     | -0.388 | 0.698   |
| Post-transplant 1 month  | 41.94±26.78            | 48.75±26.67             | -0.608 | 0.544   |

|                        |   |                     |                     |        |       |
|------------------------|---|---------------------|---------------------|--------|-------|
| Post-transplant months | 3 | 49.00 (14.33-62.75) | 54.50 (45.56-72.75) | -1.383 | 0.167 |
| Post-transplant months | 6 | 57.90 (46.00-58.80) | 58.80 (47.75-66.50) | -0.975 | 0.329 |

---

Scr, serum creatinine; eGFR, estimated glomerular filtration rate. CDC-XM, complement-dependent cytotoxicity crossmatch; Scr, serum creatinine; eGFR, estimated glomerular filtration rate.

---

Table SX. Statistical description of Proteinuria (qualitative) in patients categorized by the CDC-XM levels

| Time                      | Group   | Proteinuria (qualitative) |      |      |      |      | Z      | P-value |
|---------------------------|---------|---------------------------|------|------|------|------|--------|---------|
|                           |         | -                         | -+   | 1+   | 2+   | 3+   |        |         |
| Post-transplant<br>days   | CDC≤10% | 0.00                      | 0.00 | 0.38 | 0.31 | 0.31 | -0.215 | 0.830   |
|                           | CDC>10% | 0.11                      | 0.17 | 0.30 | 0.29 | 0.13 |        |         |
| Post-transplant<br>month  | CDC≤10% | 0.59                      | 0.16 | 0.17 | 0.05 | 0.03 | -1.896 | 0.058   |
|                           | CDC>10% | 0.25                      | 0.19 | 0.50 | 0.06 | 0.00 |        |         |
| Post-Transplant<br>months | CDC≤10% | 0.79                      | 0.11 | 0.04 | 0.05 | 0.01 | -1.637 | 0.102   |
|                           | CDC>10% | 0.58                      | 0.25 | 0.09 | 0.08 | 0.00 |        |         |
| Post-Transplant<br>months | CDC≤10% | 0.79                      | 0.08 | 0.10 | 0.00 | 0.00 | -1.637 | 0.102   |
|                           | CDC>10% | 0.63                      | 0.06 | 0.19 | 0.12 | 0.00 |        |         |
| Post-Transplant<br>months | CDC≤10% | 0.82                      | 0.06 | 0.11 | 0.01 | 0.00 | -0.209 | 0.835   |
|                           | CDC>10% | 0.80                      | 0.10 | 0.10 | 0.01 | 0.00 |        |         |

CDC-XM, complement-dependent cytotoxicity crossmatch.

Table SXI. Statistical description of Proteinuria (qualitative) in patients categorized by the HLA matching

| Time                   | Group |           | Proteinuria (qualitative) |      |      |      |      | Z    | P-value |       |
|------------------------|-------|-----------|---------------------------|------|------|------|------|------|---------|-------|
|                        |       |           | -                         | -+   | 1+   | 2+   | 3+   |      |         |       |
| Post-transplant days   | 7     | HLA<br>MM | 0-2                       | 0.08 | 0.12 | 0.33 | 0.29 | 0.18 | -0.475  | 0.635 |
|                        |       | HLA<br>MM | 3-6                       | 0.20 | 0.25 | 0.25 | 0.30 | 0.00 |         |       |
| Post-transplant month  | 1     | HLA<br>MM | 0-2                       | 0.46 | 0.18 | 0.28 | 0.05 | 0.03 | -1.546  | 0.122 |
|                        |       | HLA<br>MM | 3-6                       | 0.65 | 0.10 | 0.20 | 0.05 | 0.00 |         |       |
| Post-Transplant months | 2     | HLA<br>MM | 0-2                       | 0.74 | 0.14 | 0.06 | 0.05 | 0.01 | -2.072  | 0.038 |
|                        |       | HLA<br>MM | 3-6                       | 0.95 | 0.00 | 0.00 | 0.05 | 0.00 |         |       |
| Post-Transplant months | 3     | HLA<br>MM | 0-2                       | 0.75 | 0.08 | 0.13 | 0.03 | 0.01 | -0.761  | 0.447 |
|                        |       | HLA<br>MM | 3-6                       | 0.85 | 0.10 | 0.00 | 0.05 | 0.00 |         |       |
| Post-Transplant months | 6     | HLA<br>MM | 0-2                       | 0.79 | 0.06 | 0.14 | 0.01 | 0.00 | -1.579  | 0.114 |
|                        |       | HLA<br>MM | 3-6                       | 0.95 | 0.05 | 0.00 | 0.00 | 0.00 |         |       |

HLA, human leukocyte antigen.

Table SXII. Markers in patients categorized by donor category.

| A, Scr          |          |                         |                        |        |         |
|-----------------|----------|-------------------------|------------------------|--------|---------|
| Group           |          | DCD<br>n=58             | LD<br>n=54             | t/Z    | P-value |
| Pre-transplant  | 1 day    | 1017.27±241.20          | 827.80±274.07          | 3.872  | 0.000   |
| Post-transplant | 1 day    | 976.60 (774.65-1178.85) | 556.10 (399.37-745.25) | -6.376 | 0.000   |
| Post-transplant | 2 days   | 810.15 (525.87-1063.92) | 242.85 (193.55-381.52) | -7.057 | 0.000   |
| Post-transplant | 3 days   | 697.10 (317.95-866.90)  | 163.95 (137.90-237.95) | -6.635 | 0.000   |
| Post-transplant | 7 days   | 253.65 (158.22-550.57)  | 127.35 (100.87-174.80) | -5.142 | 0.000   |
| Post-transplant | 1 month  | 182.00 (130.75-343.90)  | 144.00 (114.50-194.65) | -2.353 | 0.019   |
| Post-transplant | 3 months | 146.50 (115.35-178.25)  | 139.50 (109.25-162.25) | -1.054 | 0.292   |
| Post-transplant | 6 months | 144.42 (134.75-165.00)  | 138.00 (114.00-155.40) | -1.817 | 0.069   |
| B, Urea         |          |                         |                        |        |         |
| Group           |          | DCD<br>n=58             | LD<br>n=54             | t/Z    | P-value |
| Pre-transplant  | 1 day    | 22.61±5.55              | 18.95±8.21             | 2.782  | 0.006   |
| Post-transplant | 1 day    | 27.12±6.54              | 20.70±6.13             | 5.353  | 0.000   |
| Post-transplant | 2 days   | 32.45 (25.55-36.42)     | 19.11 (14.85-24.54)    | -6.893 | 0.000   |
| Post-transplant | 3 days   | 33.46 (24.30-40.88)     | 17.69 (12.68-21.49)    | -6.574 | 0.000   |
| Post-transplant | 7 days   | 30.28 (18.75-48.44)     | 13.83 (11.27-17.66)    | -6.003 | 0.000   |
| Post-transplant | 1 month  | 14.71 (8.73-21.30)      | 9.15 (7.55-12.40)      | -3.002 | 0.003   |
| Post-transplant | 3 months | 9.31 (7.28-14.05)       | 8.99 (7.31-11.26)      | -0.786 | 0.432   |
| Post-transplant | 6 months | 9.48 (8.60-11.75)       | 8.92 (6.55-10.34)      | -1.884 | 0.060   |
| C, eGFR         |          |                         |                        |        |         |
| Group           |          | DCD<br>n=58             | LD<br>n=54             | t/Z    | P-value |
| Pre-transplant  | 1 day    | 5.0 (4.00-6.00)         | 6.00 (5.75-9.00)       | -4.668 | 0.000   |
| Post-transplant | 1 day    | 5.00 (4.00-6.00)        | 11.00 (8.00-16.00)     | -7.101 | 0.000   |
| Post-transplant | 2 days   | 6.00 (5.00-10.00)       | 29.00 (15.50-39.00)    | -7.413 | 0.000   |
| Post-transplant | 3 days   | 10.00 (6.00-18.00)      | 46.50 (27.75-58.50)    | -6.851 | 0.000   |
| Post-transplant | 7 days   | 26.00 (10.00-41.00)     | 64.00 (43.75-84.50)    | -5.362 | 0.000   |
| Post-transplant | 1 month  | 41.66±27.67             | 54.65±24.15            | -2.650 | 0.009   |
| Post-transplant | 3 months | 51.65 (39.74-73.00)     | 59.50 (48.00-71.25)    | -1.538 | 0.124   |

months

|                           |   |                     |                     |        |       |
|---------------------------|---|---------------------|---------------------|--------|-------|
| Post-transplant<br>months | 6 | 58.80 (45.75-60.25) | 58.80 (48.00-74.25) | -1.536 | 0.125 |
|---------------------------|---|---------------------|---------------------|--------|-------|

---

Scr, serum creatinine; eGFR, estimated glomerular filtration rate; DCD, donation after cardiac death; LD, living donor
